# Supplementary material
Source: PubMed Central journal article supplement (PMC137965)
Supplement: nar_30_23_5160__1.pdf [file nar_30_23_5160__1.pdf]

SUPPLEMENTARY MATERIAL

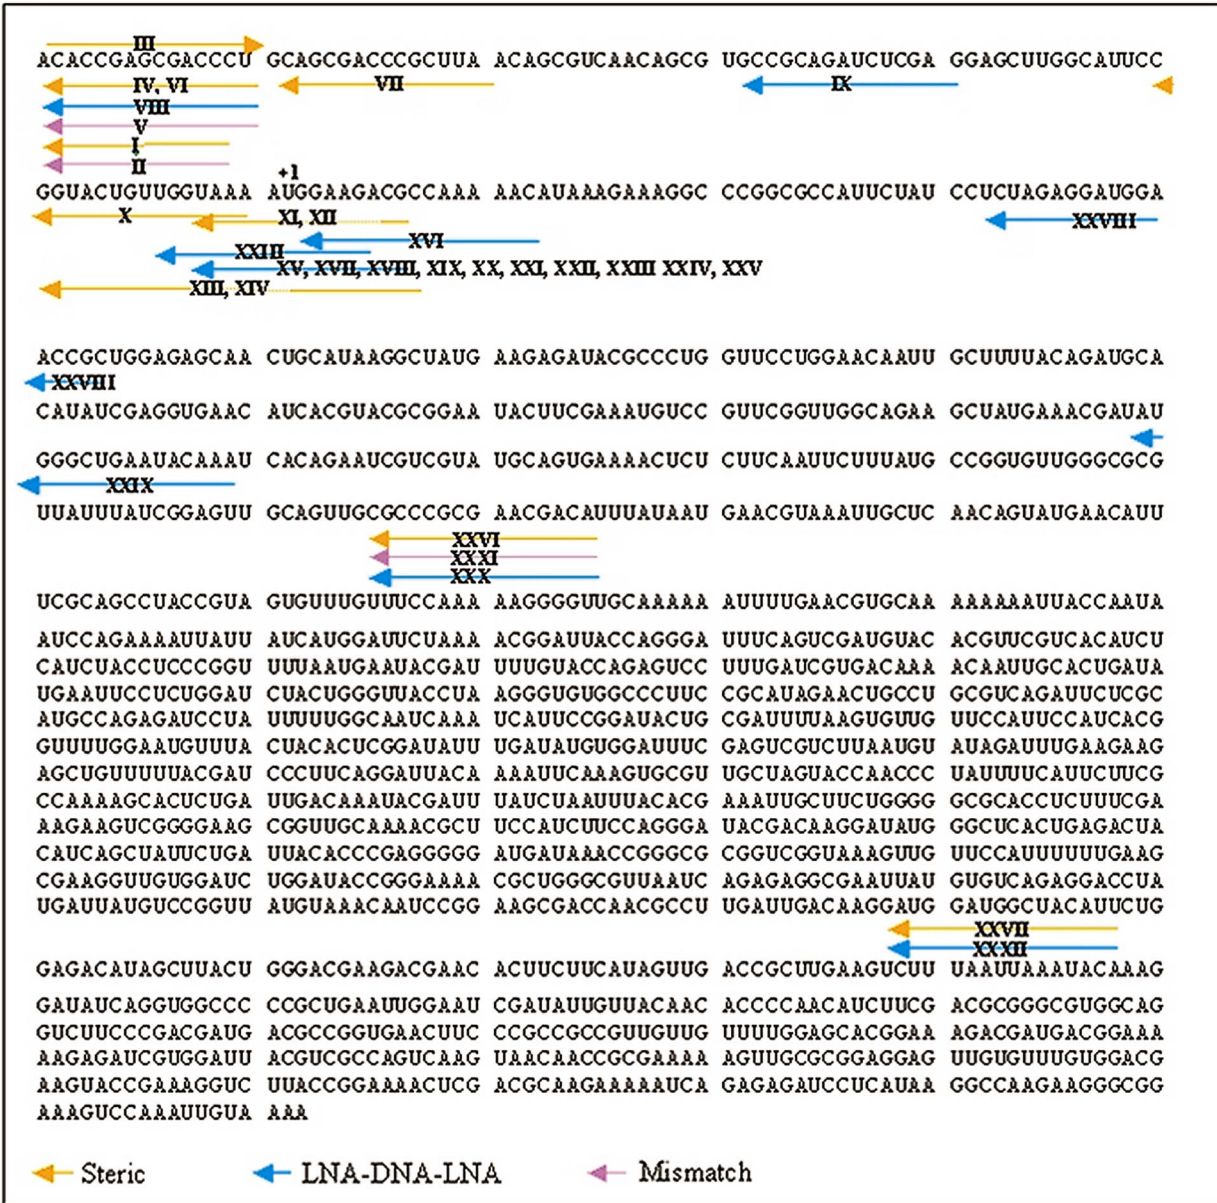

**Figure S1.** Panel A, schematic of luciferase mRNA. Panel B, mRNA sequence of luciferase and target sequence sites of the LNA and LNA-DNA chimera used in these studies.

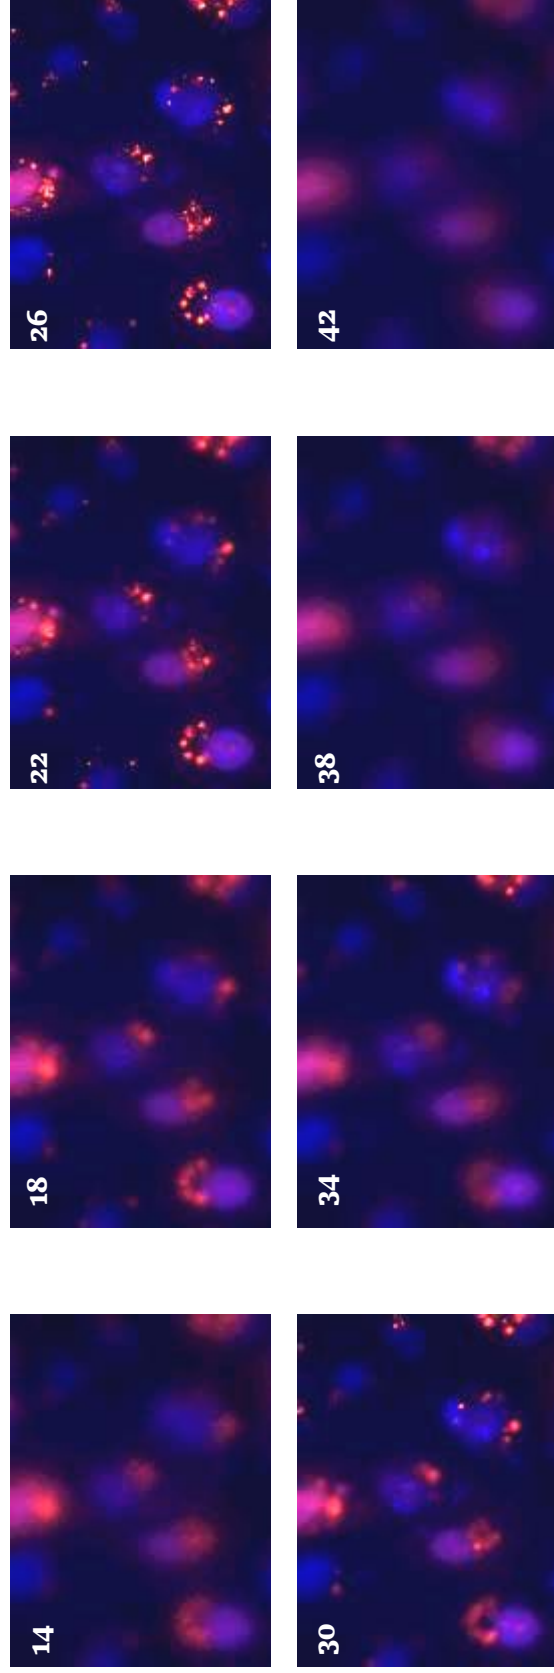

**Figure S2.** Confocal microscopy images of CV-1 cells treated with Hoechst 33258 and Cy3-LNA-DNA chimera. The optical sections were scanned incrementally (total of 43) along the Z-axis at 0.5  $\mu\text{m}$ . Section numbers corresponding to the Z-axis are given in the upper left of each panel.
